# Supplementary material
Source: PubMed Central journal article supplement (PMC5023518)
Supplement: mol-22-15_252_Nikiforou_Suppl.pdf [file mol-22-15_252_Nikiforou_Suppl.pdf]

Supplemental Data

Global Hypoxia-Ischemia Induced Inflammation and Structural Changes in the Preterm Ovine Gut Which Were Not Ameliorated by Mesenchymal Stem Cell Treatment

Maria Nikiforou,<sup>1,2</sup> Carolin Willburger,<sup>1</sup> Anja E de Jong,<sup>1</sup> Nico Kloosterboer,<sup>1</sup> Reint K Jellema,<sup>1,2</sup> Daan RMG Ophelders,<sup>1,2</sup> Harry WM Steinbusch,<sup>2</sup> Boris W Kramer,<sup>1,2,3</sup> and Tim GAM Wolfs<sup>1,3</sup>

Online address: <http://www.molmed.org>

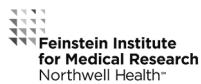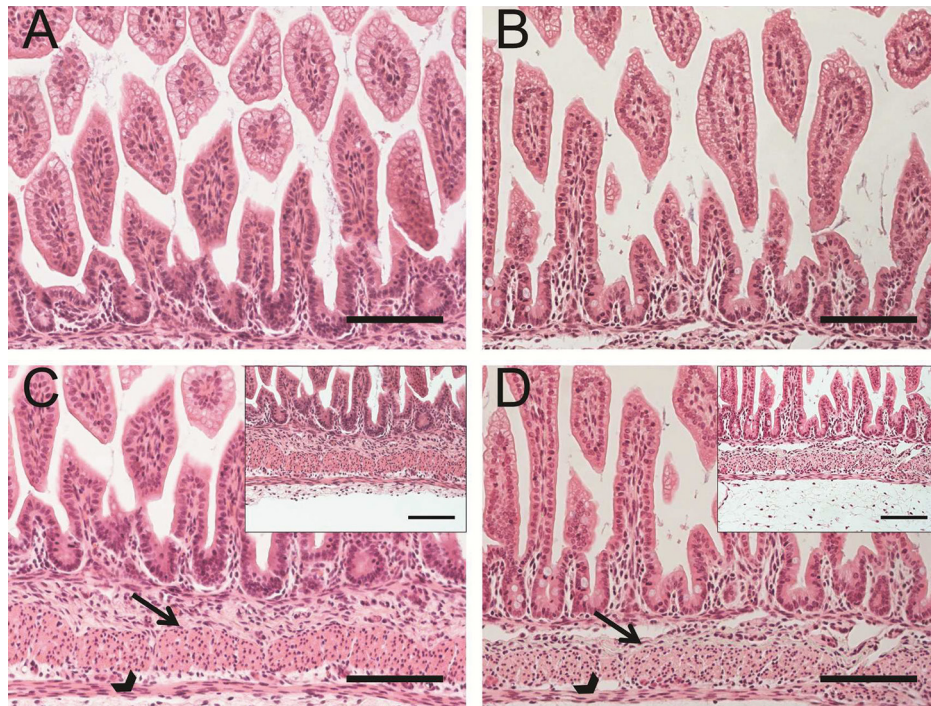

**Supplementary Figure S1.** Morphological examination of intestinal sections that were stained for H&E. No epithelial injury was detected in (A) control and (B) HI animals. In addition, the thickness of both muscle layers circular (arrow) and longitudinal (arrowhead) varied between the groups (C: control and D: HI). The scale bar in all panels represents 100  $\mu$ m.

**Supplementary Table S1.** Primers used for qPCR.

| Primer                        | Fw sequence                 | Rv sequence             |
|-------------------------------|-----------------------------|-------------------------|
| <i>ovRPS15</i>                | CGAGATGGTGGGCAGCAT          | GCTTGATTCCACCTGGTTGA    |
| <i>IL-1<math>\beta</math></i> | AGAATGAGCTGTTATTTGAGGTTGATG | GTGAGAAATCTGCAGCTGGATGT |
| <i>IL-17</i>                  | TGTGAGGGTCAACCTGAACAT       | TGATAATCGGTGGGCCTCTG    |

Abbreviations: Fw: forward; IL: interleukin; qPCR: quantitative real-time polymerase chain reaction; Rv: reverse.
